# Supplementary material for: Experimental and Theoretical Insights on Methylene Blue Removal from Wastewater Using an Adsorbent Obtained from the Residues of the Orange Industry
Source: MDPI journal article supplement (doi:10.3390/molecules26154555), 2021-07-28
Supplement: s1 [file s1]

## Supplementary data

### Experimental and theoretical insights on methylene blue removal from wastewater using an adsorbent obtained from the residues of the orange industry

Stephanie Giraldo<sup>a</sup>, Irma Robles<sup>b</sup>, Luis A. Godínez<sup>b</sup>, Nancy Acelas<sup>a\*</sup>, Elizabeth Flórez<sup>a\*</sup>

<sup>a</sup> Grupo de investigación Materiales con Impacto (Mat&mpac), Facultad de Ciencias Básicas, Universidad de Medellín, Carrera 87 No. 30-65, Medellín, Colombia

<sup>b</sup> Centro de Investigación y Desarrollo Tecnológico en Electroquímica S. C., Parque Tecnológico Querétaro, 76703 Sanfandila, Pedro Escobedo, Querétaro, Mexico

\*Corresponding author

E-mail address: nyacelas@udem.edu.co (N Acelas), [elflorez@udem.edu.co](mailto:elflorez@udem.edu.co) (E Flórez)

**Table S1** Equation kinetic models.

|                         |                                                                     |
|-------------------------|---------------------------------------------------------------------|
| Pseudo-first order      | $\text{Log}(q_e - q_t) = \text{Log } q_e - \frac{k_1}{2.303} t$ (1) |
| Pseudo-second order     | $\frac{t}{q_t} = \frac{1}{k_2 q_e^2} + \frac{t}{q_e}$ (2)           |
| Intraparticle diffusion | $q_t = k_{di} \sqrt{t} + C_i$ (3)                                   |

$q_t$ : amount of MB adsorbed in a time  $t$  ( $\text{mg g}^{-1}$ );  $q_e$  amount of MB adsorbed at equilibrium ( $\text{mg g}^{-1}$ );  $t$ : time (min);  $k_1$ : pseudo first order adsorption rate constant ( $\text{min}^{-1}$ );  $k_2$ : constant speed of pseudo second order ( $\text{g mg}^{-1} \text{ min}^{-1}$ );  $k_{di}$ : Intraparticle diffusion rate constant ( $\text{mg g}^{-1} \text{ min}^{-1/2}$ );  $C_i$ : constant ( $\text{mg g}^{-1}$ ).

**Table S2** Equations models isotherms.

|                                   |                                                                           |
|-----------------------------------|---------------------------------------------------------------------------|
| Langmuir                          | $\frac{C_e}{q_e} = \frac{1}{Q_m K_L} + \frac{C_e}{Q_m} \quad (1)$         |
| Freundlich                        | $\text{Log} Q_e = \text{Log} K_F + \frac{1}{n} \text{Log} C_e \quad (2)$  |
| Non-dimensional separation factor | $R_L = \frac{1}{1 + K_L C_i} \quad (3)$                                   |
| Temkin                            | $q_e = \frac{RT}{b} \text{Ln} K_T + \frac{RT}{b} \text{Ln} C_e \quad (4)$ |
| Dubinin–Radushkevich              | $\text{Ln} (q_e) = \text{Ln}(q_s) - K_{ad} \varepsilon^2 \quad (5)$       |
| Constante de Dubinin–Radushkevich | $\varepsilon = RT \text{Ln} \left( 1 + \frac{1}{C_e} \right) \quad (6)$   |
| Free energy                       | $E = \frac{1}{\sqrt{2K_{ad}}} \quad (7)$                                  |

$C_e$  : MB concentration in equilibrium ( $\text{mg L}^{-1}$ );  $q_e$ : amount of MB adsorbed at equilibrium ( $\text{mg g}^{-1}$ );  $Q_m$ : maximum capacity of adsorbate ( $\text{mg g}^{-1}$ );  $K_L$ : constant of Langmuir ( $\text{L g}^{-1}$ );  $K_F$ : Freundlich dissociation constant ( $\text{mg g}^{-1}$ );  $n$ : constant related to reaction intensity;  $R_L$ : non-dimensional separation factor;  $C_i$ : is the initial concentration of MB ( $\text{mg L}^{-1}$ );  $b$ : constant associated with the heat of adsorption ( $\text{kJ mol}^{-1}$ );  $K_T$ : Temkin constant ( $\text{L g}^{-1}$ );  $T$ : temperature (K);  $R$ : gas constant ( $0.008314 \text{ kJ mol}^{-1} \text{ K}^{-1}$ );  $q_s$ : theoretical capacity of isothermal saturation ( $\text{mg g}^{-1}$ ),  $K_{ad}$ : isothermal constant of Dubinin–Radushkevich ( $\text{mol}^2 \text{ kJ}^{-2}$ );  $\varepsilon$ : Dubinin–Radushkevich constant;  $E$ : Free energy ( $\text{KJ mol}^{-1}$ ).

Table S3 shows the data corresponding to the proximate analysis and elemental analysis of biomass (OP). High volatile material content (87.15%) and average fixed carbon content (8.90%) were found, indicating that a reasonable amount of carbon is available for thermochemical transformation. In addition, the high elemental content of carbon (43.60%) indicates that OP is a suitable precursor for the preparation of adsorbent materials.

**Table S3** Biomass analysis data

| Biomass | Moisture Content (%) | Proximate Analysis  |      |       | Elemental Analysis (Wt %) <sup>a</sup> |       |      |      |                |
|---------|----------------------|---------------------|------|-------|----------------------------------------|-------|------|------|----------------|
|         |                      | (Wt %) <sup>a</sup> |      |       | N                                      | C     | H    | S    | O <sup>b</sup> |
|         |                      | MV                  | CF   | Ashes |                                        |       |      |      |                |
| OP      | 7.42                 | 87.15               | 8.90 | 3.95  | 0.60                                   | 43.60 | 5.60 | 0.20 | 50.00          |

MV: Volatile material; CF: Fixed Carbon; N: Nitrogen; C: carbon; H: Hydrogen; S: Sulfur; O: Oxygen

OP: Orange Peel Biomass

<sup>a</sup> On a dry basis

<sup>b</sup> By difference ( $O\% = 100\% - C\% - N\% - H\% - S\%$ )

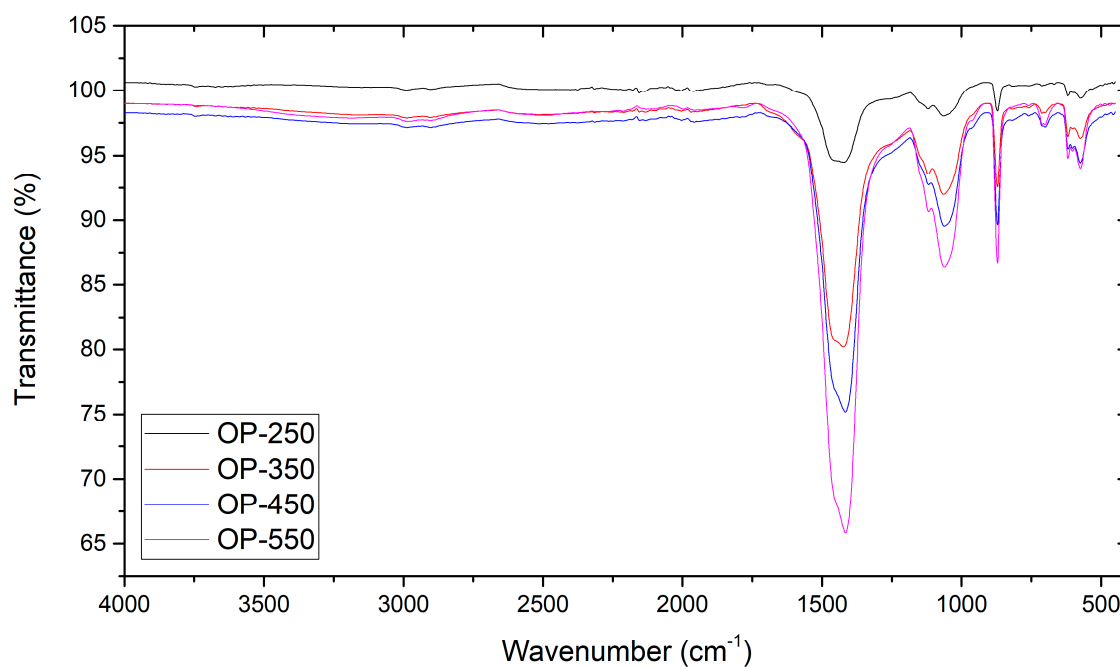**Figure S1** FTIR spectra of calcined materials at different temperatures.

**Table S4** Parameters for the different kinetic models for the adsorption of MB on OP, AZOP-550 and AHOP.

| Material                                                         | OP    |       |        |        |        | AZOP-550 |        |        |        |        | AHOP  |       |       |       |        |
|------------------------------------------------------------------|-------|-------|--------|--------|--------|----------|--------|--------|--------|--------|-------|-------|-------|-------|--------|
| $C_0$ (mg L <sup>-1</sup> )                                      | 50    | 100   | 150    | 200    | 250    | 50       | 100    | 150    | 200    | 250    | 50    | 100   | 150   | 200   | 250    |
| $q_{e \text{ exp}}$ (mg g <sup>-1</sup> )                        | 35.35 | 83.35 | 107.51 | 138.40 | 146.26 | 48.89    | 100.08 | 141.52 | 180.59 | 190.19 | 41.80 | 77.05 | 87.84 | 96.37 | 108.14 |
| Pseudo first order                                               |       |       |        |        |        |          |        |        |        |        |       |       |       |       |        |
| $k_1$ (min <sup>-1</sup> ) x 10 <sup>-2</sup>                    | 0.18  | 0.16  | 0.81   | 0.60   | 0.16   | 5.99     | 0.94   | 0.35   | 0.28   | 0.02   | 4.63  | 2.67  | 3.20  | 4.35  | 4.42   |
| $q_e$ (mg g <sup>-1</sup> )                                      | 11.02 | 16.63 | 26.28  | 34.15  | 31.56  | 22.79    | 36.39  | 63.56  | 109.67 | 119.67 | 19.69 | 38.67 | 42.78 | 49.42 | 55.74  |
| $R^2$                                                            | 0.68  | 0.45  | 0.67   | 0.61   | 0.43   | 0.96     | 0.82   | 0.87   | 0.95   | 0.92   | 0.92  | 0.92  | 0.93  | 0.95  | 0.88   |
| Pseudo second order                                              |       |       |        |        |        |          |        |        |        |        |       |       |       |       |        |
| $k_2$ (g mg <sup>-1</sup> min <sup>-1</sup> ) x 10 <sup>-2</sup> | 0.18  | 0.09  | 0.07   | 0.05   | 0.06   | 1.33     | 0.13   | 0.03   | 0.01   | 0.01   | -     | -     | -     | -     | -      |
| $q_e$ (mg g <sup>-1</sup> )                                      | 34.72 | 84.03 | 111.11 | 138.89 | 147.06 | 49.26    | 101.01 | 142.86 | 185.19 | 222.22 | 40.98 | 72.46 | 84.75 | 94.34 | 109.89 |
| $R^2$                                                            | 1.00  | 1.00  | 1.00   | 1.00   | 1.00   | 1.00     | 1.00   | 1.00   | 1.00   | 1.00   | 1.00  | 1.00  | 1.00  | 1.00  | 1.00   |
| Intra-particle Diffusion                                         |       |       |        |        |        |          |        |        |        |        |       |       |       |       |        |
| $K_{d1}$ (mg g <sup>-1</sup> min <sup>1/2</sup> )                | 6.04  | 15.68 | 16.83  | 19.27  | 21.08  | 10.30    | 15.50  | 13.07  | 13.11  | 13.80  | 8.77  | 13.90 | 17.11 | 19.43 | 21.11  |
| $C_1$ (mg g <sup>-1</sup> )                                      | 3.31  | 11.77 | 14.58  | 27.88  | 26.36  | 5.36     | 4.67   | 11.80  | 10.83  | 11.85  | 4.49  | 6.49  | 7.01  | 8.80  | 10.21  |
| $R^2$                                                            | 0.89  | 0.81  | 0.86   | 0.78   | 0.82   | 0.90     | 0.96   | 0.90   | 0.91   | 0.91   | 0.90  | 0.92  | 0.93  | 0.92  | 0.91   |
| $K_{d2}$ (mg g <sup>-1</sup> min <sup>1/2</sup> )                | 0.60  | 0.67  | 1.09   | 0.68   | 0.89   | 0.54     | 3.89   | 4.12   | 4.82   | 5.37   | 0.69  | 1.51  | 1.51  | 1.13  | 1.96   |
| $C_2$ (mg g <sup>-1</sup> )                                      | 22.47 | 66.23 | 88.19  | 119.95 | 120.20 | 43.90    | 54.25  | 63.29  | 61.27  | 58.71  | 34.85 | 58.13 | 69.40 | 82.85 | 87.21  |
| $R^2$                                                            | 0.98  | 0.91  | 0.97   | 0.73   | 0.78   | 0.85     | 0.95   | 0.95   | 0.98   | 0.98   | 0.83  | 0.88  | 0.81  | 0.77  | 0.81   |

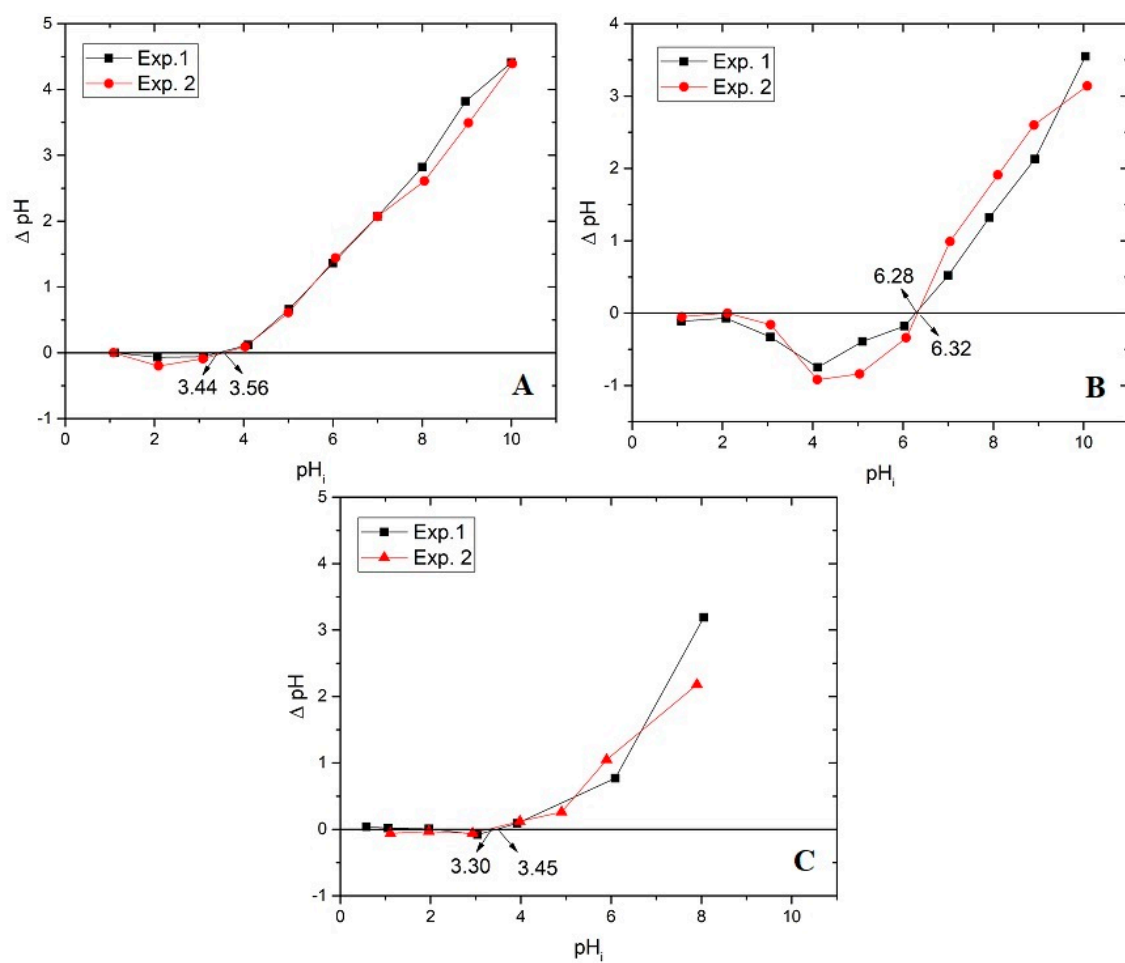

**Figure S2**  $pH_{PZC}$  of adsorbent materials. A: OP; B: AZOP-550; C: AHOP.

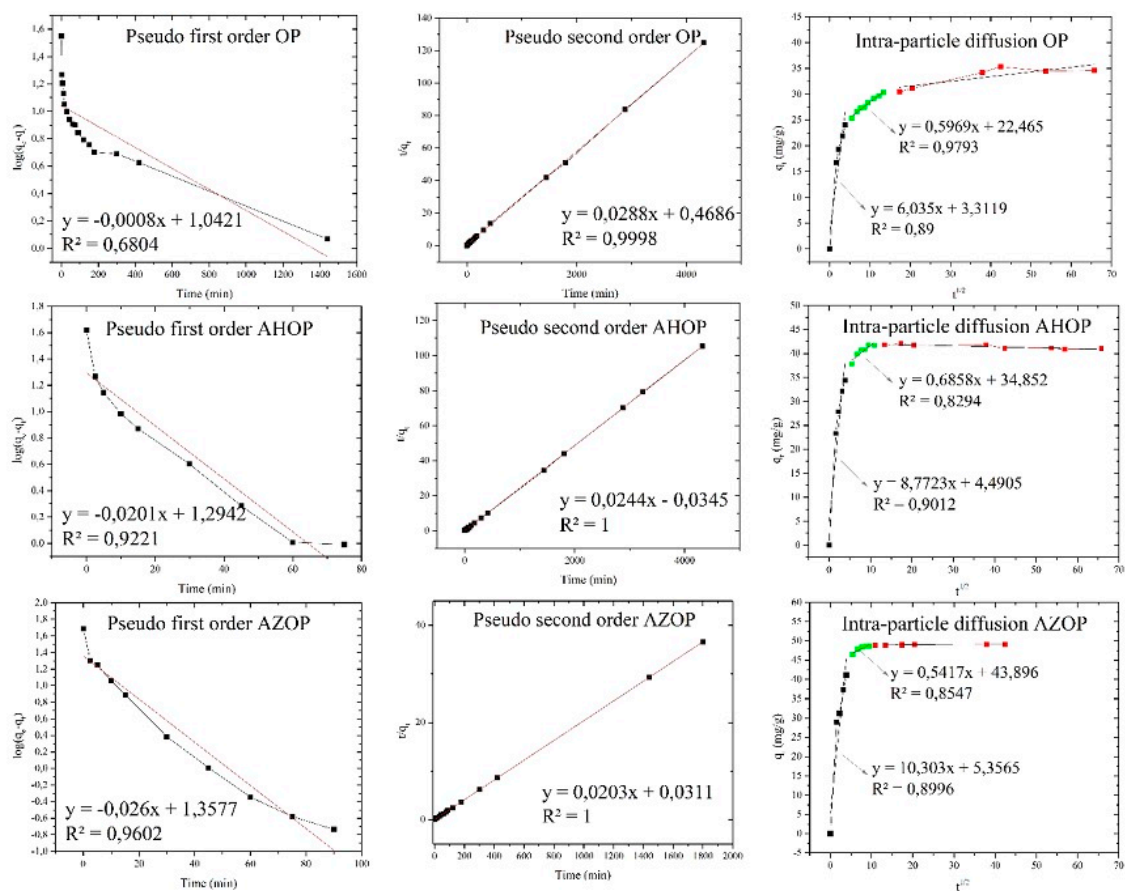

**Figure S3** Graphs of the adsorbents (OP, AHOP and AZOP-550) for kinetic models with the equation ( $C_0$  50 mg L<sup>-1</sup>).

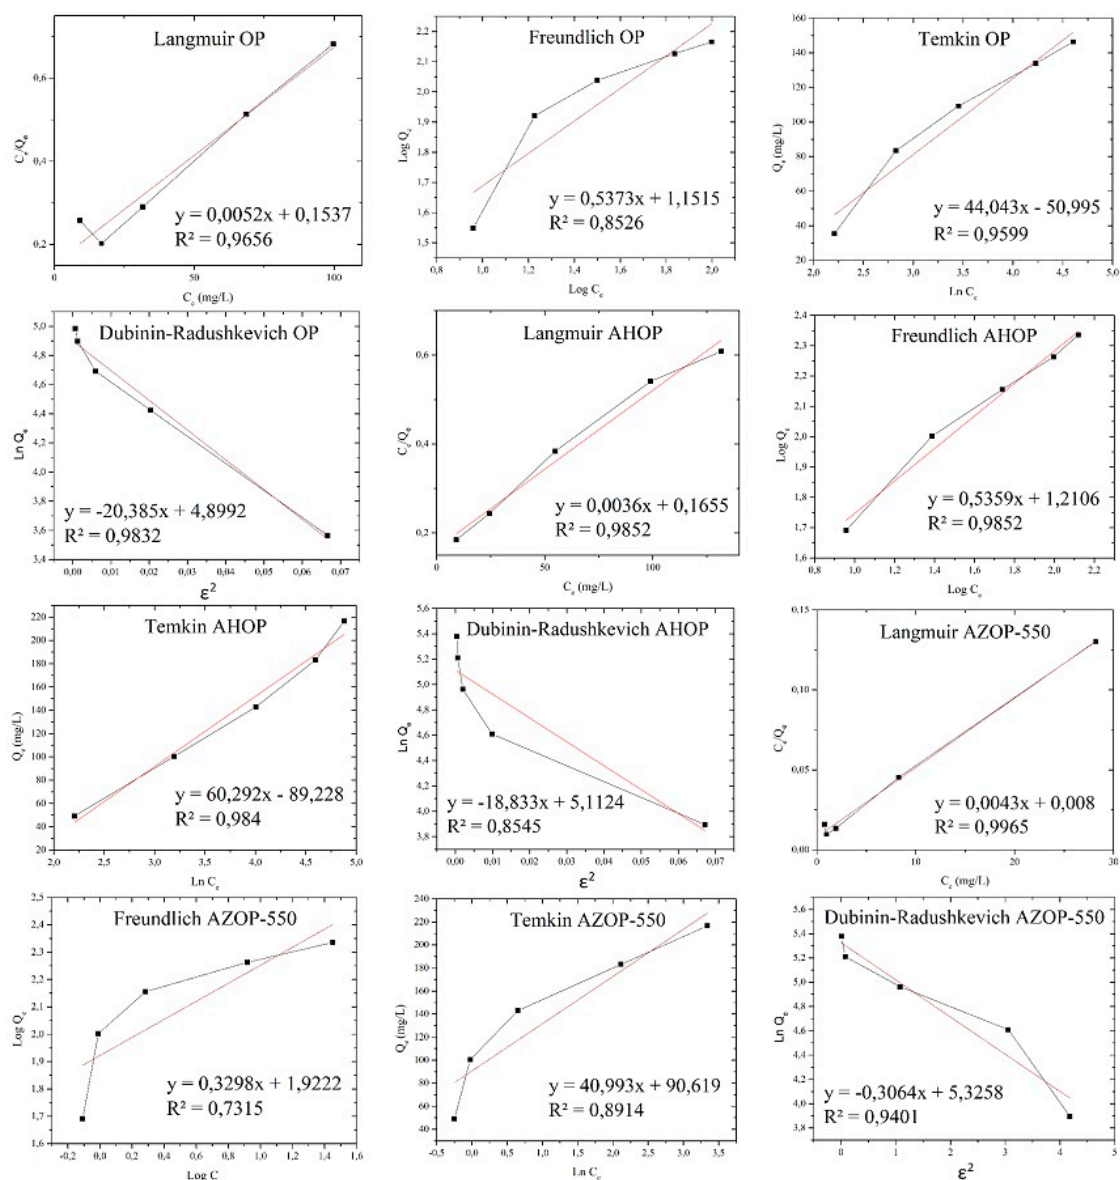

**Fig. S4** Graphs of the adsorbents (OP, AHOP and AZOP-550) for isotherm models with the equation.

**Table S5.** Total energy (Hartree) of all systems

| System                         | Total energy |
|--------------------------------|--------------|
| <b>Pristine</b>                | -2680.464443 |
| <b>MB+</b>                     | -1182.544357 |
| Pristine_MB+ ( $\pi$ - $\pi$ ) | -3863.008475 |
| <b>Phenol (-OH)</b>            | -2755.682871 |
| Ar-OH_MB+ ( $\pi$ - $\pi$ )    | -3938.22802  |
| Ar-OH_MB+ (H-bonding)          | -3938.236415 |
| <b>Ar-COOH</b>                 | -2869.023318 |
| Ar-COOH_MB+ ( $\pi$ - $\pi$ )  | -4051.568077 |
| Ar-COOH_MB+ (H-bonding)        | -4051.577932 |
| <b>Ar-COO-</b>                 | -2868.555377 |
| Ar-COO-MB+ (electrostatic-m1)  | -4051.105465 |
| Ar-COO-MB+ (electrostatic-m2)  | -4051.113211 |
| Ar-COO-MB+ (electrostatic-m3)  | -4051.112613 |
| Ar-COO-MB+ (electrostatic-m4)  | -4051.112396 |
| <b>Ar-CO</b>                   | -2755.104225 |
| Ar-CO-MB+ ( $\pi$ - $\pi$ )    | -3937.646012 |
